# Supplementary material
Source: ML conference proceedings conference paper supplement (https://openaccess.thecvf.com/content/CVPR_2019/html/Liu_Feature_Distillation_DNN-Oriented_CVPR_2019_paper.html)
Supplement: Supplementary file 1 [file Liu_Feature_Distillation_DNN-Oriented_CVPR_2019_supplemental.pdf]

# Supplementary Material : Feature Distillation: DNN-Oriented JPEG Compression Against Adversarial Examples

Zihao Liu<sup>1</sup>, Qi Liu<sup>1</sup>, Tao Liu<sup>1</sup>, Nuo Xu<sup>1</sup>, Xue Lin<sup>2</sup>, Yanzhi Wang<sup>2</sup>, Wujie Wen<sup>1</sup>

<sup>1</sup> Florida International University, <sup>2</sup> Northeastern University

{zliu021,qliu020,tliu023,nxu003,wwen}@fiu.edu, {xue.lin, yanz.wang}@northeastern.edu

In this supplementary material, we compare the visual artifacts (PSNR/SSIM) of three random selected images compressed by our “feature distillation” (FD) method and the standard JPEG at different quality factors (QFs).

## 1 Comparison of Visual Quality–Qualitative

Fig. 1 and Fig. 2 illustrate the corresponding visual results produced by default JPEG compression and our “feature distillation” method, respectively. As Fig. 2 shows, it is hardly to perceive the differences between the original (QF=100, JPEG) and our FD(1x) compressed images for human eyes. To better mitigate the most recent BPDA attack, we further increase the quantization step of our method–FD(2x) and FD(3x). As Fig. 2 shows, the visual distortions are still very limited compared with JPEG images with lower QFs.

## 2 Comparison of Visual Quality–Quantitative

As Table. 1 shows, all these three images compressed by our method (FD(1x)) can achieve reasonable PSNR and SSIM, e.g. close to that of  $QF = 75$  for JPEG, which is still acceptable for most visual systems. Similarly, the PSNR and SSIM of our FD(2x) and FD(3X) are comparable with JPEG method at  $QF = 50$  and  $QF = 20$ , respectively.

Table 1: The comparison of PSNR/SSIM between “feature distillation” (FD) and JPEG.

|                    | Img. 1 |      | Img. 2 |      | Img. 3 |      |
|--------------------|--------|------|--------|------|--------|------|
|                    | PSNR   | SSIM | PSNR   | SSIM | PSNR   | SSIM |
| <b>JEPG(QF=75)</b> | 33.63  | 0.94 | 28.64  | 0.94 | 35.64  | 0.97 |
| <b>JEPG(QF=50)</b> | 31.41  | 0.92 | 26.05  | 0.89 | 33.75  | 0.96 |
| <b>JEPG(QF=20)</b> | 28.81  | 0.87 | 23.56  | 0.82 | 31.03  | 0.94 |
| <b>FD(1x)</b>      | 33.05  | 0.93 | 29.12  | 0.94 | 34.86  | 0.97 |
| <b>FD(2x)</b>      | 30.03  | 0.89 | 26.29  | 0.89 | 32.53  | 0.95 |
| <b>FD(3x)</b>      | 28.44  | 0.86 | 24.15  | 0.84 | 31.11  | 0.94 |

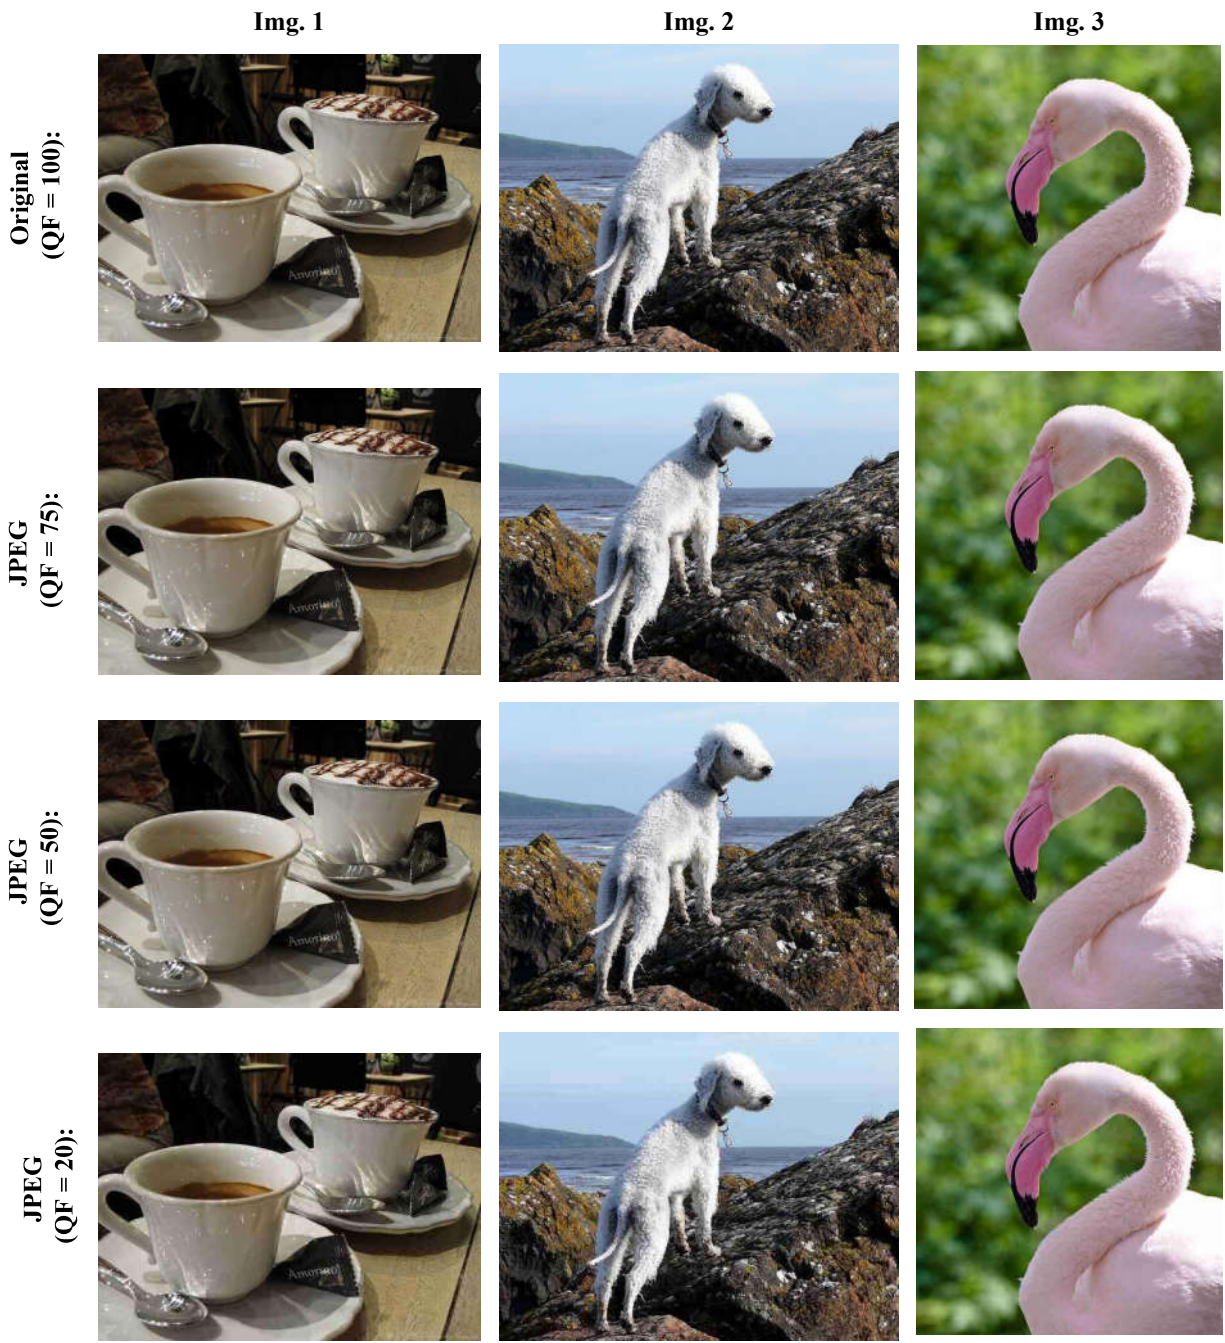

Figure 1: Example visual results produced by default JPEG compression.

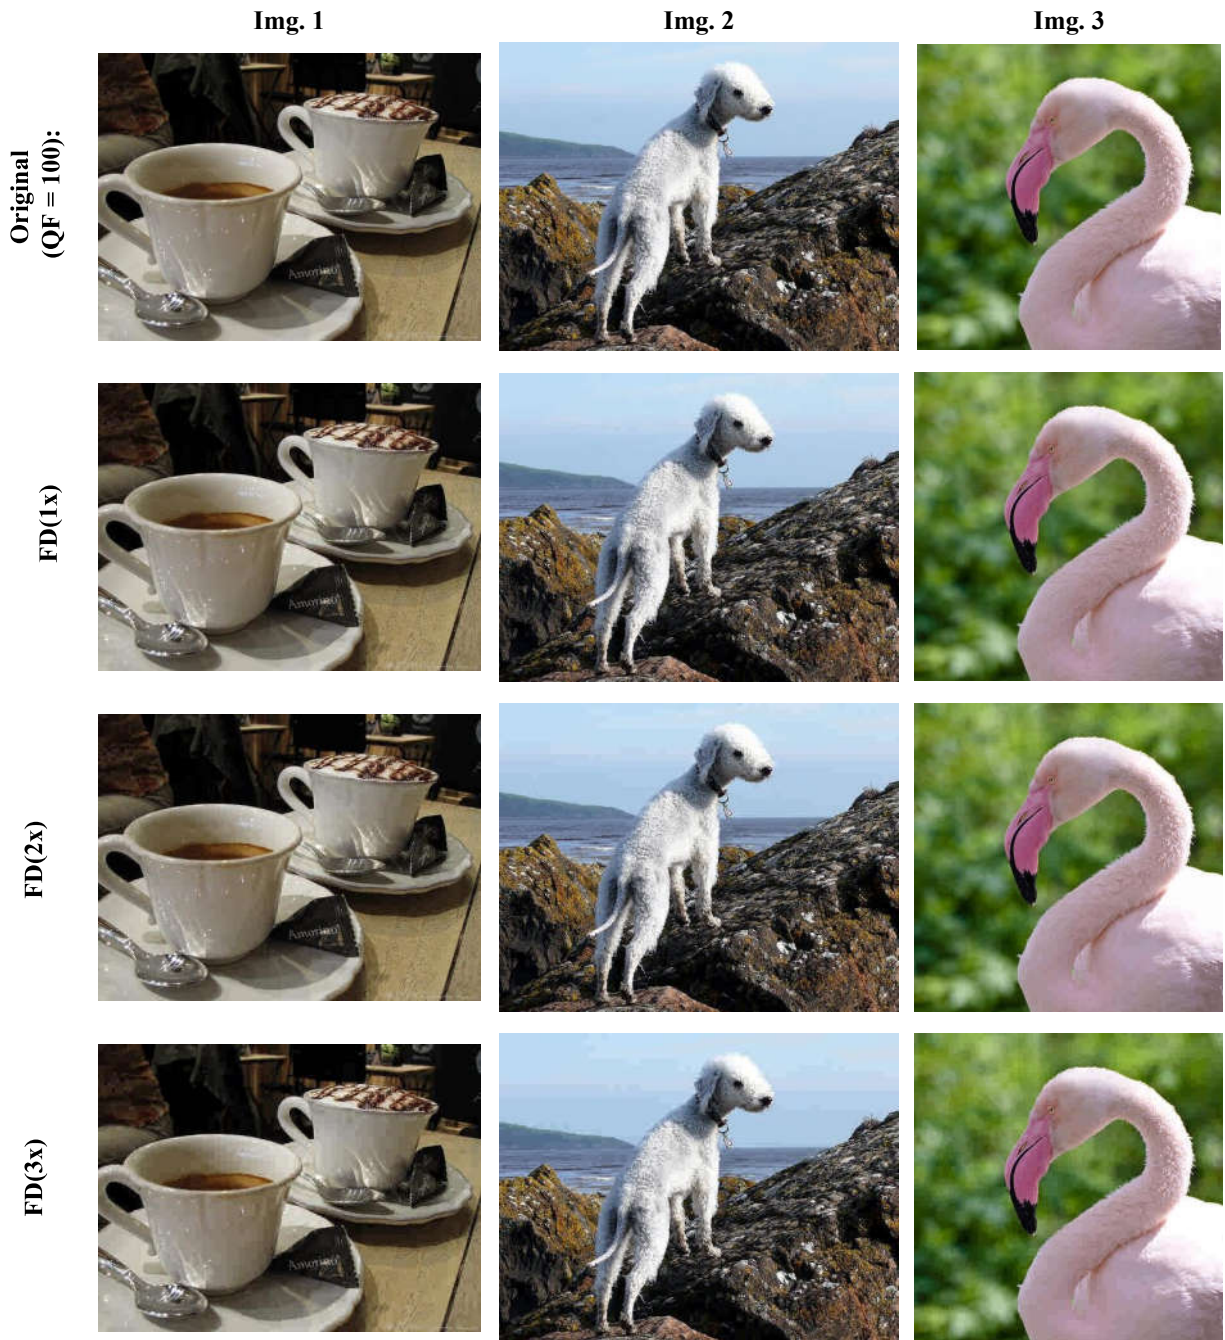

Figure 2: Examples visual results produced by “feature distillation” method.
